# Supplementary material for: Delta-Like Ligand–Notch1 Signaling Is Selectively Modulated by HPV16 E6 to Promote Squamous Cell Proliferation and Correlates with Cervical Cancer Prognosis
Source: Oxford University Press journal article supplement (doi:10.1158/0008-5472.can-20-1996), 2021-01-26
Supplement: 00085472can201996-sup-245120_2_supp_6849782_qmzpmx.docx [file 00085472can201996-sup-245120_2_supp_6849782_qmzpmx.docx]

**Supplementary Table 1.**

Clinicopathological characteristics of molecular cervical cancer subgroups (TCGA)

|  |  | |  | |
| --- | --- | --- | --- | --- |
| **Variable** | **Columnar (n=56) Squamous/Reserve (n=223)**  No. of patients (%) | | **Total (n=279)** | ***P*-value**a |
| Lymphovascular space invasion |  |  |  |  |
| Absent  Present | 17 (53)  15 (47) | 48 (46)  56 (54) | 136 | 0.547 |
| Lymph node involvement |  |  |  |  |
| Absent  Present | 28 (72)  11 (28) | 93 (67)  46 (33) | 178 | 0.698 |
| FIGO-stage |  |  |  |  |
| Early (I-IIA)  Late (IIA1-IVB) | 41 (73)  15 (27) | 124 (57)  92 (43) | 272 | 0.033 |
| Grade |  |  |  |  |
| I-II (Well/Moderate)  III (Poor) | 29 (57)  22 (43) | 111 (56)  87 (44) | 249 | 1.000 |
| HPV type |  |  |  |  |
| HPV16  HPV18  HPV45  Other | 28 (50)  22 (39)  6 (11)  0 (0) | 139 (62)  15 (7)  17 (8)  52 (23) | 279 | **<0.00001b** |
| Chemotherapy |  |  |  |  |
| Not received  Received | 22 (51)  21 (49) | 83 (43)  110 (57) | 236 | 0.397 |
| Radiotherapy |  |  |  |  |
| Not received  Received | 13 (29)  32 (71) | 63 (32)  132 (68) | 240 | 0.725 |

aBonferroni-adjustedα: 0.006. Statistically significant values are bold

b The ‘other HPV types’-group was excluded from analysis. The *P*-value stated is the result of the global Chi-square test. *P*-values of individual tests were compared to a Bonferroni-adjusted α. HPV18 was significantly enriched in the columnar-derived group (*χ*2 = 41.25, df =1, *P*<0.00001)
